# Supplementary material for: Preparation of 4D hydrogels with PET-RAFT and orthogonal photo-reactions
Source: Royal Society of Chemistry journal article supplement (doi:10.1039/d4lp00232f), 2024-10-25
Supplement: d4lp00232f1.pdf [file d4lp00232f1.pdf]

## Supporting Information

### Preparation of 4D Hydrogel with PET-RAFT and Orthogonal Photo-reaction

Chanhyuk Jee<sup>a</sup>, Hikaru Matsumoto<sup>a</sup>, Tasuku Horiuchi<sup>a</sup>, Zaiyang Liu<sup>b</sup>,

Zhongkui Wang<sup>b</sup>, Obayashi Kakeru<sup>c</sup>, Ken Kojio<sup>d</sup>, Masanori Nagao<sup>a</sup> and Yoshiko Miura<sup>a\*</sup>

*a. Department of Chemical Engineering, Graduate School of Engineering, Kyushu University, 744 Motoooka, Nishi-ku, Fukuoka, Japan, 819-0395.*

*b. Department of Robotics, Ritsumeikan University, Kusatsu 525-8577, Japan*

*c. Institute for Materials Chemistry and Engineering, Kyushu University, Fukuoka 819-0395, Japan*

\*Corresponding authors:

Prof. Yoshiko Miura

E-mail: miuray@chem-eng.kyushu-u.ac.jp

Tel: +81-92-802-2749

Fax: +81-92-802-2769

- 1. Monomer synthesis**
- 2. Physical properties of hydrogels**
- 3. Experimental conditions**

## 1. Synthesis

### a) Synthesis of cinnamoyl ethyl acrylate (CEA)

**Scheme S1.** Synthesis of cinnamoyl ethyl acrylate (CEA).

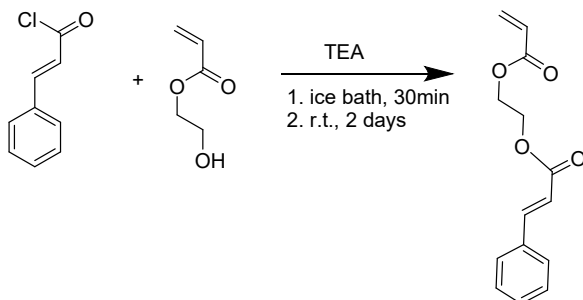

5.6 g (48 mmol) of 2-hydroxyethylacrylate (2-HEA), 3.3 g (32 mmol) Triethylamine (TEA) were dissolved in 40 ml of solvent, THF, and made N<sub>2</sub> atmosphere by nitrogen purging in 3-neck flask with stirring by magnetic bar in ice bath for made 0 °C condition. At the same time, 7 g(42 mmol) of Cinnamoyl chloride dissolved in 20 ml of THF completely then dropped slowly by dropping funnel for 10min to prepared 3-neck glass setting. After dropping time was overreacted 3 hours in ice bath then 21 hour in room temperature. The reaction mixture was evaporated, and dissolved in CH<sub>2</sub>Cl<sub>2</sub> 100 mL. The solution was washed with MillQ water for 3 times. TEA-HCl salt was filtered and the reaction mixture was purified by silica gel chromatography (Biotage: EtOAc:hexane (gradient)) and the solution was removed by evaporator to get the yellow liquid . The product was analyzed by <sup>1</sup>H-NMR.

Yield 3.58 g , 28.4 %

### a-1) NMR peak of CEA's

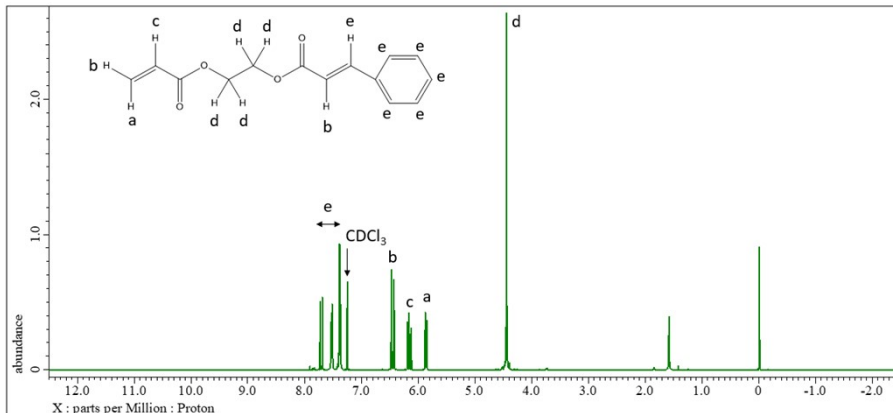

Figure S1. <sup>1</sup>H NMR of CEA.

### b) Synthesis of a RAFT agent of 3-(benzylthiocarbonothioylthio)propanoic acid (BTPA)

#### Scheme S-2 Synthesis of 3-(benzylthiocarbonothioylthio)propanoic acid (BTPA).

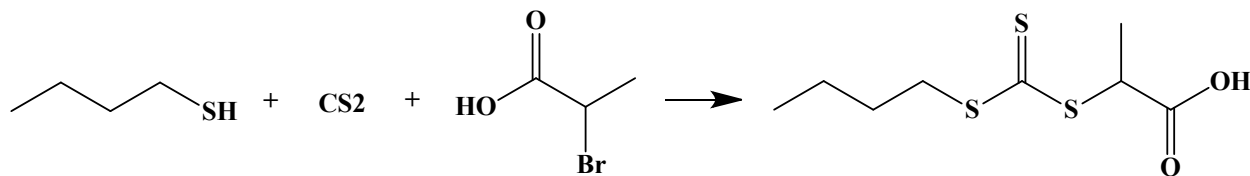

First, 50wt% sodium hydroxide solution (NaOH, 1.03 g and distilled water 1.03ml) in 3-neck flask was prepared. After dissolve complete, added butanethiol 2.25 g (2.68 ml, 25 mmol) and acetone 2 ml, distilled water 3.75ml as additional solvent. With stirring continues 30 min after, carbon disulfide 1.69 ml(2.1 g, 28 mmol) added in ice bath to keep temperature 10° C below. After 30 min, wait to synthesis temperature back to the room temperature (not heat), then added 2-bromopropanoic acid 2.3 ml (3.92g, 25.6mmol) with reaction temperature keep 30 ° C below condition. And using dropping funnel, NaOH 50 wt% aqueous solution 2 g dropped slowly by dropping funnel for 30 min. After exotherm stopped, ice bath removed then added distilled water 3.75 ml. Reaction continue to 24 hour under room temperature. After 24 hour, the solution dilute step proceed with added distilled water 6.25 ml. Then isolated and added 11.2 M HCl 4~5 ml with ice bath for keep temperature 10 ° C below. Then yellow

solid was collected used acid for precipitation then filtered and stirred in distilled water (cold temperater) for 15 min. Collected filtered yellow solid wash with cold distilled water and dry using vacuum method. After vacuum dried yellow soild dissolved in hexane 11.25 ml at 40 ° C then recrystallized with fridge then filtered. With this cycle proceed several times for purification.

Yield 3.17 g , 38.3 %

### b-1) NMR peak of BTPA's

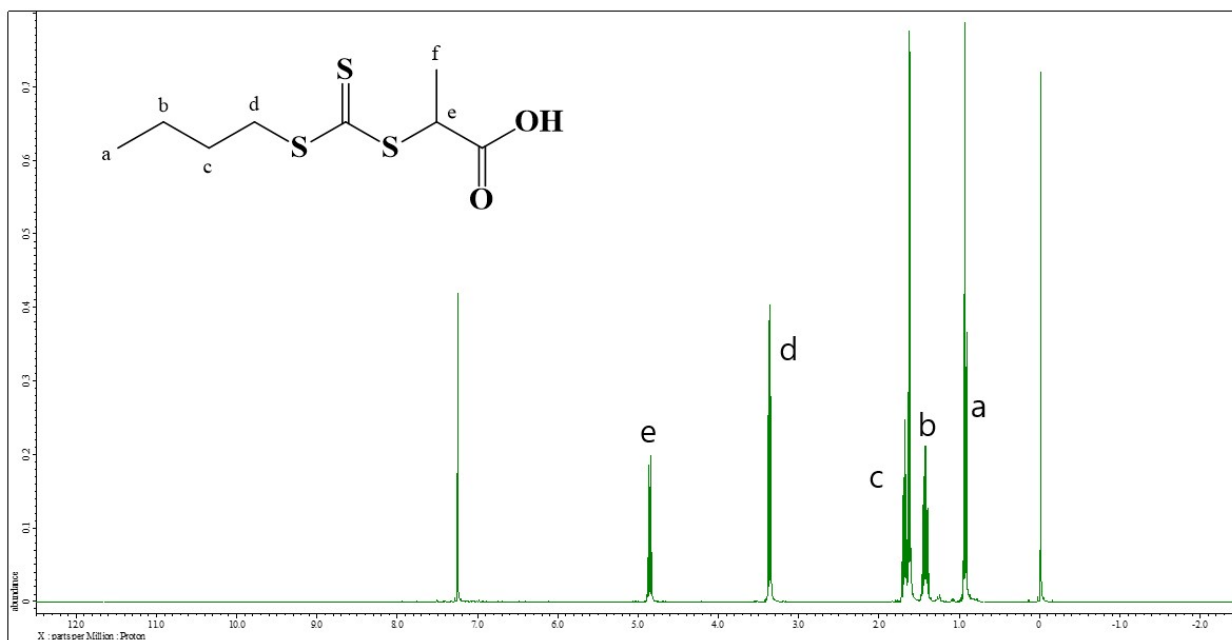

**Figure S2.** <sup>1</sup>H NMR of BTPA

## 2. Physical properties of hydrogels

a) Young's modulus, crosslinking density calculation at angular frequency 1 by under table conclusions

**Table S1. Frequency sweep analysis for Storage modulus, Loss modulus, Young's modulus, Crosslink density and Tangent delta of PET-RAFT & Orthogonal reaction hydrogel (at angular frequency at 1)**

| Sample name | Storage Shear Modulus (Pa) | Young's Modulus (Pa)* | Loss Shear Modulus (Pa) | Crosslink Density (mole/m <sup>3</sup> ) | Tangent delta |
|-------------|----------------------------|-----------------------|-------------------------|------------------------------------------|---------------|
| G15B0       | 16900                      | 50721                 | 473                     | 2.27                                     | 0.028         |
| G15B1       | 18000                      | 54147                 | 1330                    | 2.42                                     | 0.074         |
| G15B3       | 19400                      | 58584                 | 2230                    | 2.61                                     | 0.115         |
| G15B5       | 22100                      | 66375                 | 1050                    | 2.97                                     | 0.048         |
| G15B10      | 22000                      | 66048                 | 826                     | 2.96                                     | 0.038         |
| G15B15      | 22000                      | 66105                 | 1250                    | 2.96                                     | 0.057         |
| G15B30      | 22200                      | 66957                 | 2300                    | 2.99                                     | 0.104         |

\*Young's modulus can be calculated with 3 times shear modulus approximately.

Following these equations under blow

$$E(\text{Young's modulus}) = 2G(1 + \nu)$$

$G(\text{Shear modulus}), \nu(\text{Poisson's ratio} \sim 1)$

$$E'(\text{Storage Modulus}) = 3\rho RT$$

( $\rho$ =Crosslink Density,  $R$ =Gas constan,  $8.314 \text{ J}\cdot\text{mol}^{-1}\cdot\text{K}^{-1}$  and  $T$ =Absolute temperature,  $298\text{K}$ )

$$E(\text{Shear modulus}) = E'(\text{Storage Modulus}) + iE''(\text{LossModulus})$$

$$\text{Tangent delta} = \frac{\text{Loss modulus}}{\text{Storage modulus}}$$

b) SEM image about hydrogel samples after freeze dry.

The prepared hydrogels were measured by field emission scanning electron microscopy (FE-SEM, SU8000)

### G15 B0

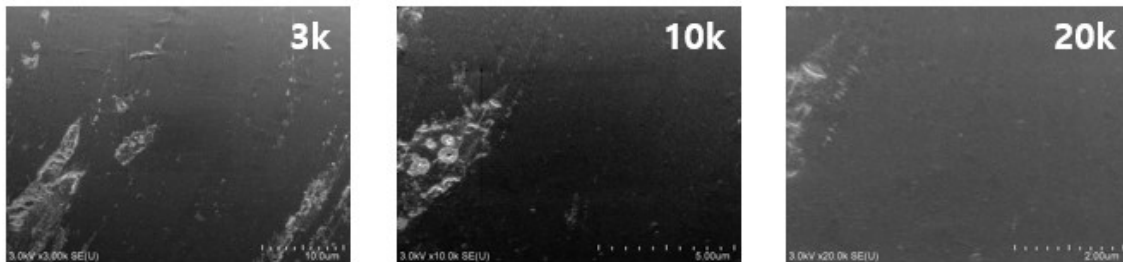

Figure S3. SEM micrographs of G15B0.

### G15 B5

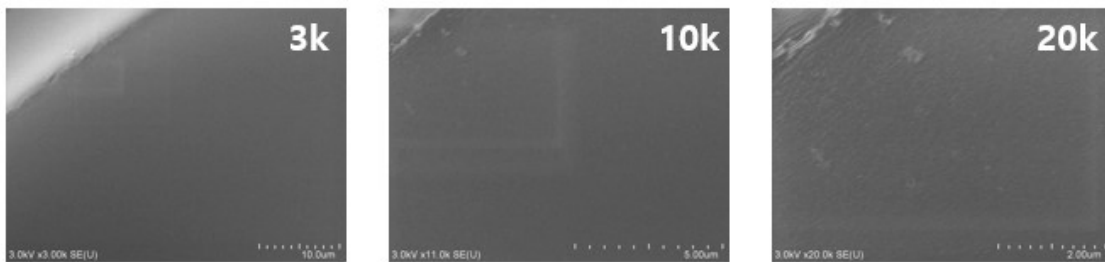

Figure S4. SEM micrographs of G15BB5.

### G15 B30

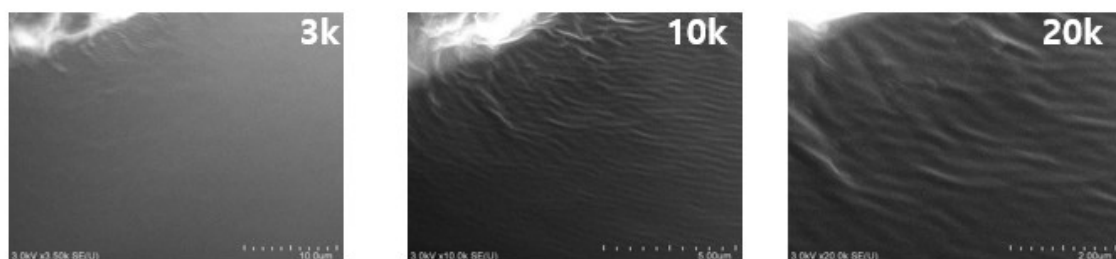

Figure S5. SEM micrographs of G15BB30.

## h) Differential Scanning Calorimetry (DSC) analysis

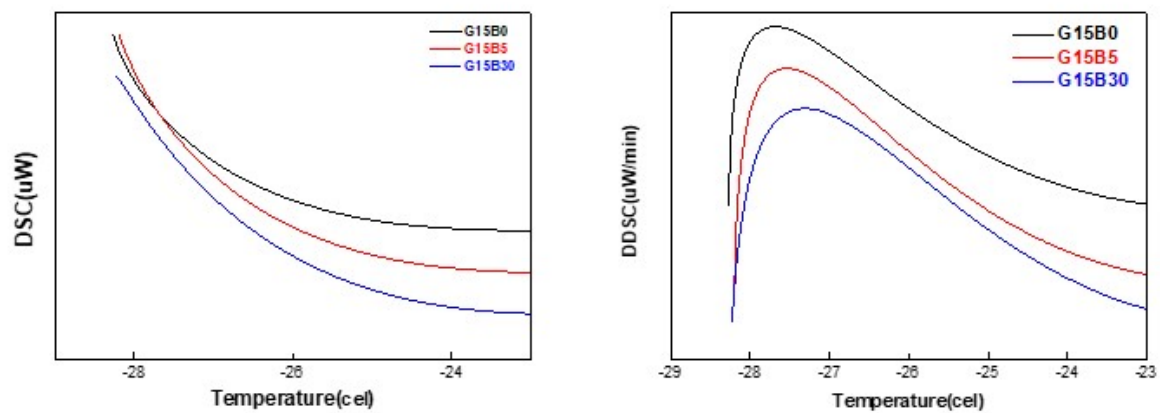

Figure S6. □ Thermal analysis of the hydrogels.

Table S2 Glass transition temperature ( $T_g$ ) of the hydrogels.

|               | $T_g$ ( $^{\circ}\text{C}$ ) |
|---------------|------------------------------|
| <b>G15B0</b>  | 27.68                        |
| <b>G15B5</b>  | 27.53                        |
| <b>G15B30</b> | 27.14                        |



### 3. Experimental conditions.

#### a) Light intensity of LED.

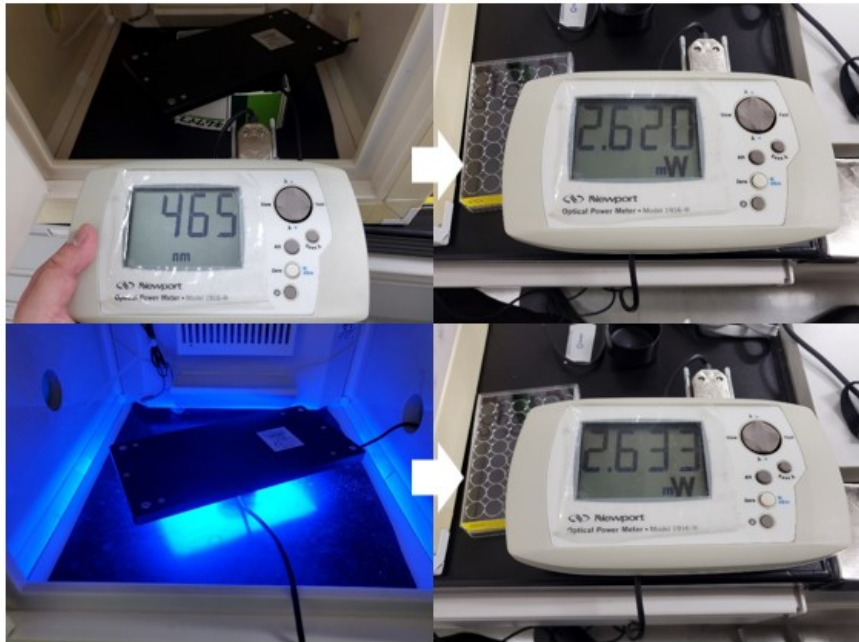

Blue light intensity area 2.620mW to 2.633mW.

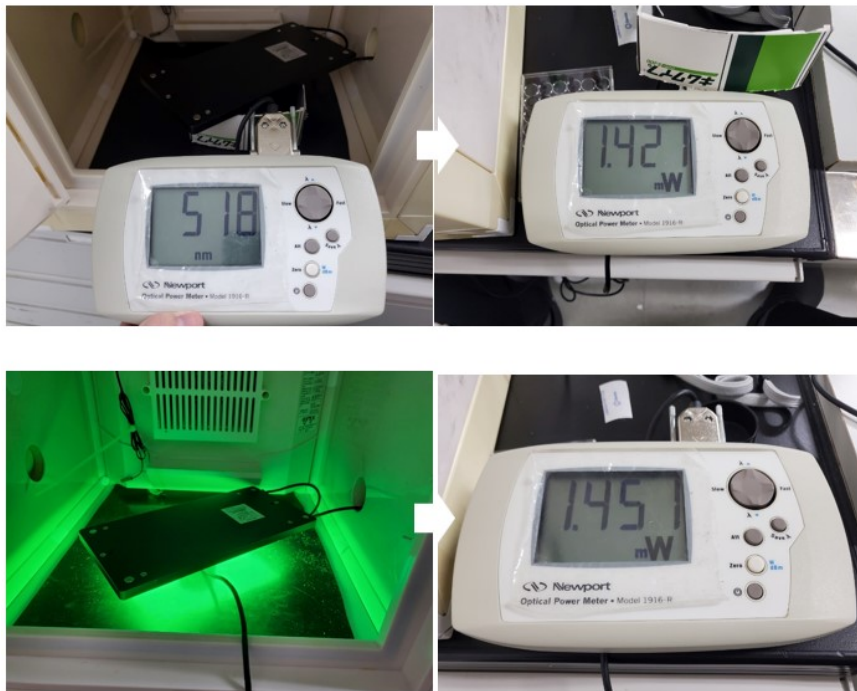

Green light intensity area 1.421mW to 1.451mW.

(All of sample analysis of light intensity have condition about distance to detector that 5cm to 0cm. )

## b) Definition of bending angle

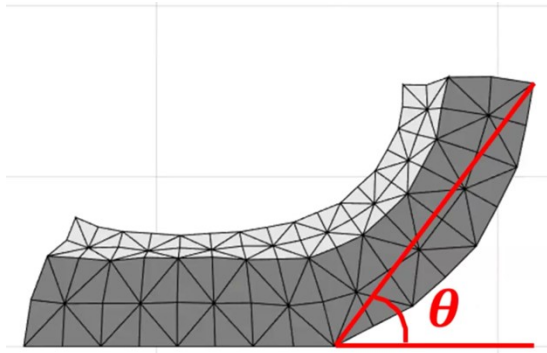

Figure S7. Definition of bending angle of hydrogel.
